# Supplementary material for: Development of a new largely scalable in vitro prion propagation method for the production of infectious recombinant prions for high resolution structural studies
Source: PubMed Central journal article supplement (PMC6827918; doi:10.1371/journal.ppat.1008117), 2019-10-23
Supplement: ppat.1008117.s002.pdf [file ppat.1008117.s002.pdf]

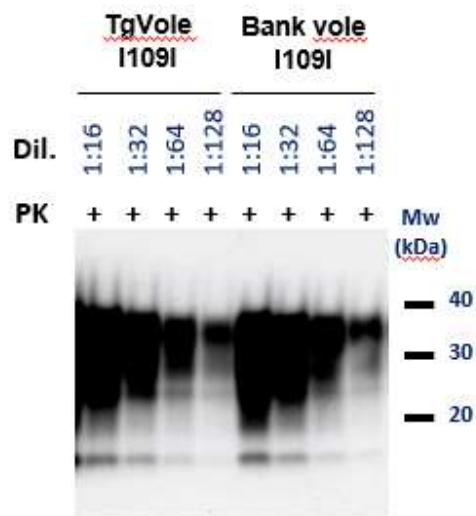

**Fig. S2. PrP expression levels in TgVole (1x) animals compared to PrP expression levels of bank vole I109I by Western blot.** 10% brain homogenates from TgVole (1x) (I109I) mouse and bank vole I109I were diluted 1:16, 1:32, 1:64 and 1:128 and analyzed by Western blot using monoclonal antibody D18 (1:5,000). The PrP expression levels of TgVole (1x) were equal to PrP<sup>C</sup> levels in bank vole brain based on signal intensity. No significant differences were observed in the electrophoretic migration patterns. Mw: Molecular weight.
