# Supplementary material for: Development of a new largely scalable in vitro prion propagation method for the production of infectious recombinant prions for high resolution structural studies
Source: PubMed Central journal article supplement (PMC6827918; doi:10.1371/journal.ppat.1008117), 2019-10-23
Supplement: ppat.1008117.s004.pdf [file ppat.1008117.s004.pdf]

**S1 Table. L-seeded-PMSA protease K-resistant fragments identified by ESI-TOF.**

| <b>Experimental mass</b> | <b>Sequence</b>                                         | <b>Theoretical mass</b> |
|--------------------------|---------------------------------------------------------|-------------------------|
| 9435.13                  | N153-S231                                               | 9436.44                 |
| 9321.03                  | M154-S231                                               | 9322.34                 |
| 9451.43                  | N153-S231 (MetSO) <sup>1</sup>                          | (+16)                   |
| 9337.81                  | M154-S231 (MetSO)                                       | (+16)                   |
|                          | 1                                                       |                         |
| 6105.20                  | N97-E152                                                | 6106.93                 |
|                          | Q98-N153                                                | 6106.93                 |
| 6219.46                  | N97-N153                                                | 6221.03                 |
| 6088.28                  | N97-E152 (N-terminal aspartic succinimide) <sup>2</sup> | (-17)                   |
|                          | Q98-N153 (N-terminal pyroglutamic acid) <sup>2</sup>    | (-17)                   |
| 5991.26                  | N97-E153                                                | 5995.83                 |
| 5974.18                  | N97-N153 (N-terminal pyroaspartate) <sup>1</sup>        | (-17)                   |

<sup>1</sup> Oxidation of Met to methionine sulfoxide (MetSO).<sup>2</sup> <https://abrf.org/delta-mass>
